# Supplementary material for: Genomic Diversity and Selection Signatures reveal Insights into Adaptation and Genetic Erosion in Asian Zebu Cattle
Source: Research Square preprint supplement (doi:10.21203/rs.3.rs-5693882/v1), 2025-04-30

**Supplementary Table ST1. Details of Asian Zebu Cattle breeds used in the study**

| **Breed Name** | **Image** | **Description** |
| --- | --- | --- |
| Alambadi (India)  (Tamil Nadu Veterinary and Animal Sciences University, Chennai, India) | 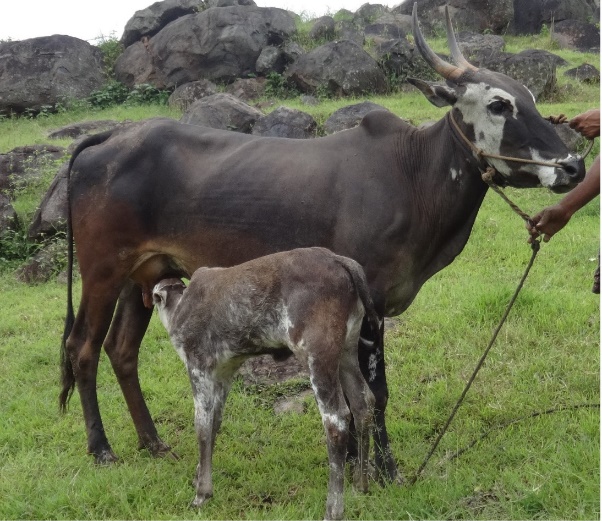 | - Mainly found in the hilly regions of the Dharmapuri and Krishnagiri districts of Tamil Nadu, with some presence along the border of Karnataka - Dual Purpose (Milk/Draught) - Medium sized - Grey coat with white markings - Good for milk and draught work   (Manomohan et al., 2021; Ware, 1942) |
| Bargur (India)  (Tamil Nadu Veterinary and Animal Sciences University, Chennai, India) | **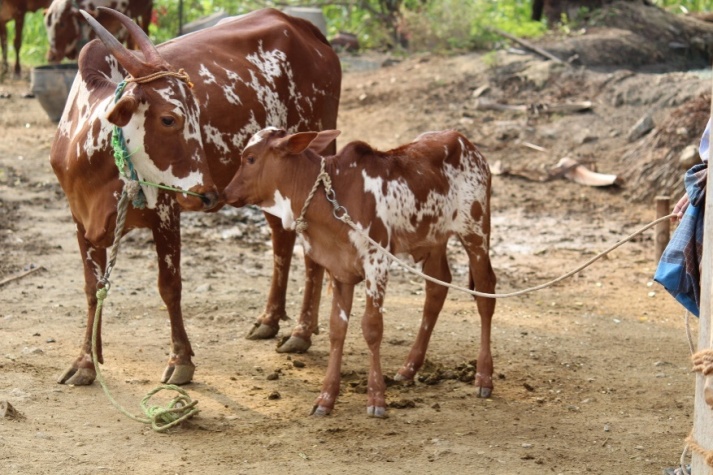** | - Found in and around the Bargur hills, specifically in the Bhavani and Anthiyur taluks of Erode district in Tamil Nadu - Used for Draught - Medium sized (smaller and compact) - Coat colour typically red and white or red with white spots. Sometimes dark brown coat with white patches - Well adapted to hilly terrain, have speed and endurance in trotting - Aggressive nature, fiery, restless, and difficult to train   (Ganapathi, 2009; Pundir, 2009) |
| Deoni (India)  (Tamil Nadu Veterinary and Animal Sciences University, Chennai, India) | 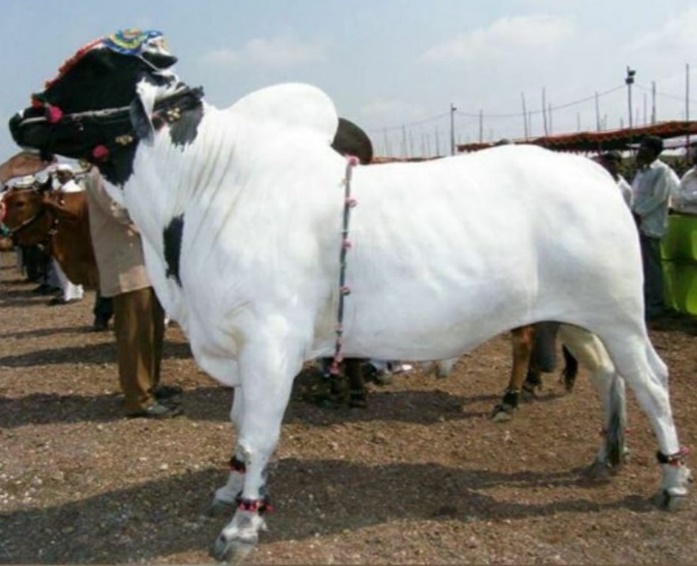 | - Found in Maharashtra , distributed in Bidar and Gulbarga districts of Karnataka; Medak district of Andhra Pradesh; Latur, Parbhani, Nanded and Osmanabad districts of Maharashtra - Dual purpose breed (Milk/Draught) - Large sized - Mainly has 3 strains based on coat color   - Wannera (white coat colour with black colour at the sides of face)   - Shevera (white coat with irregular black spots)   - Balankya (white coat with black spots on lower side of the body) - High milk yield, good draught capacity   (Dongre VB, 2017; Kuralkar SV, 2014) |
| Hallikar (India)  (Tamil Nadu Veterinary and Animal Sciences University, Chennai, India) | 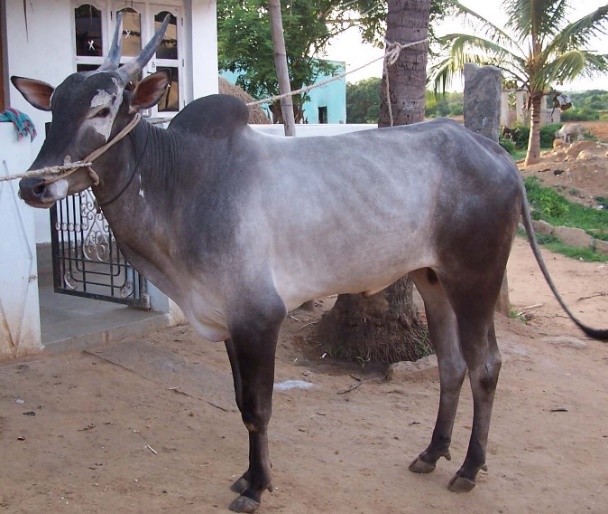 | - Distributed in the districts of Mysore, Tumkur, Chitradurga, Mandya, Kolar and Hassan in Karnataka state of South India - Draught breed - Large sized - A sturdy, powerful and docile breed that can work on average 8.18h/day   (P. R. A. S. K. S. G. M. A. K. Singh PK, 2008) |
| Kangayam (India)  (Tamil Nadu Veterinary and Animal Sciences University, Chennai, India) | **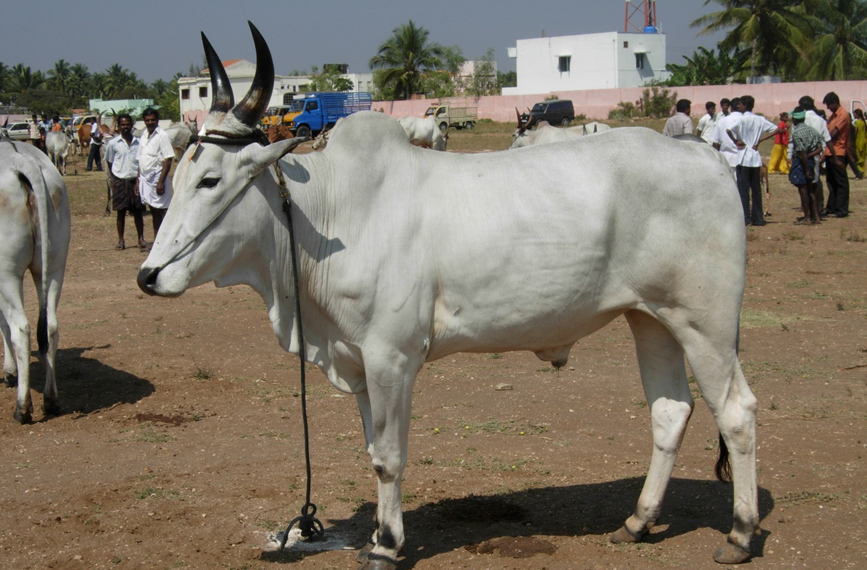** | - Kangayam, Dharapurm, Perundurai, Karur and Palani areas of Tamil Nadu located in southern India - Draught breed - Medium-sized - Usually has white or grey coat, darker at forequarters, lighter in hindquarters - Well adapted to drought prone areas and can thrive under scanty rations   (Natarajan A, 2012) |
| Ongole (India)  (Tamil Nadu Veterinary and Animal Sciences University, Chennai, India) | 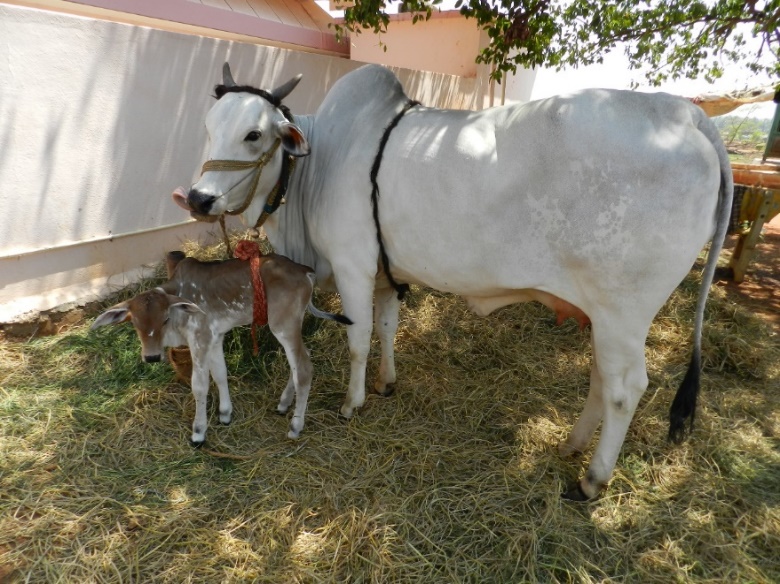 | - Found in Andhra Pradesh distributed in the Nellore and Guntur districts of Andhra Pradesh - Dual Purpose breed (Milk/Draught) - Large sized - White or light grey coat - High milk production, prized for draught work (heavy cartwork   (Joshi & Phillips, 1953) |
| Pullikulam (India)  (Tamil Nadu Veterinary and Animal Sciences University, Chennai, India) | 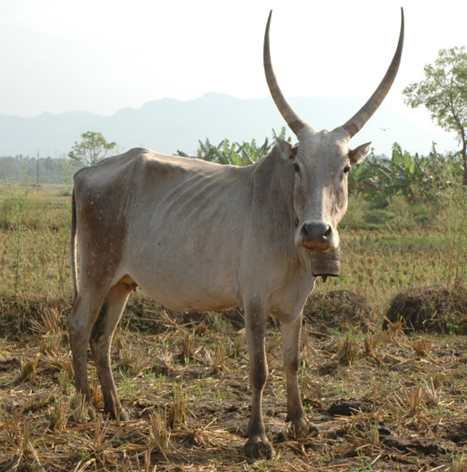 | - Found in Sivaganga, Madurai, and Virudhunagar districts in southern Tamil Nadu. - Dual purpose (Meat/Draught) - Medium sized - They have a grey or fawn coat. - Known for their strong physique   Singh et. al, (2012) |
| Punganar (India)  (Tamil Nadu Veterinary and Animal Sciences University, Chennai, India) | 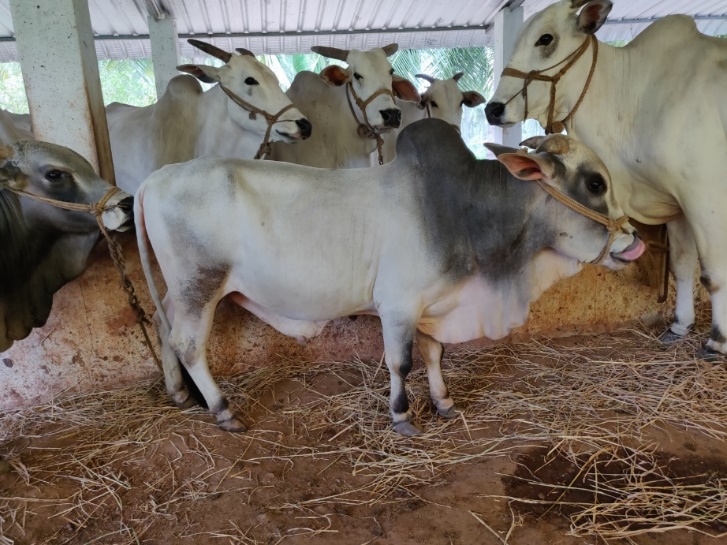 | - Unique to South India distributed in Vayalpad, Madanaspalli and Palamaneru taluks of Chittoor district of Andhra Pradesh - Dairy breed - Small sized (60-100cm) - They have white, light grey coat - They are known as efficient milk producers and one of the world's shortest breeds   (Nath , 1993) |
| Umbalacheri (India)  (Tamil Nadu Veterinary and Animal Sciences University, Chennai, India) | 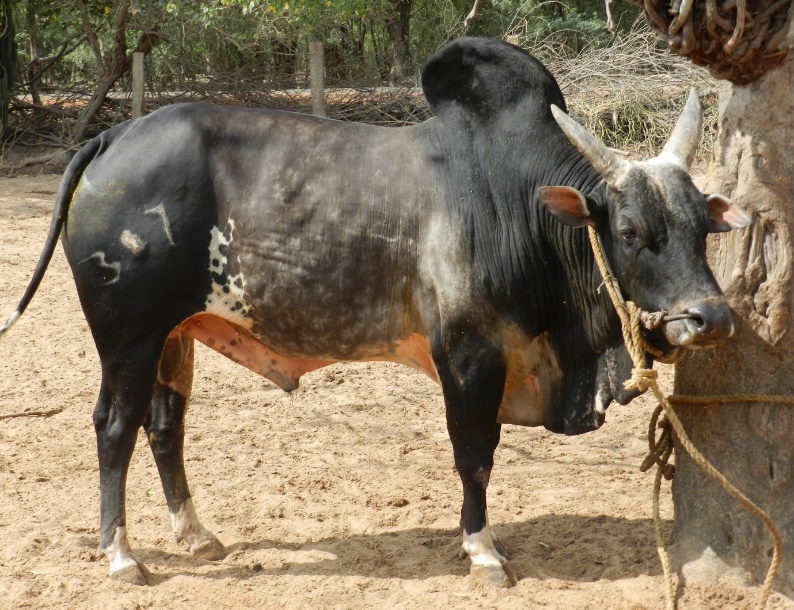 | - Found in the Eastern coastal areas of Tamil Nadu state particularly in Thiruvarur and parts of Nagapattinam districts - Draught breed - Medium sized - Coat color is particularly red - They are known for their ability to work in mashy paddy fields   (Rajendran R, 2008) |
| Vechur (India)  (Tamil Nadu Veterinary and Animal Sciences University, Chennai, India) | **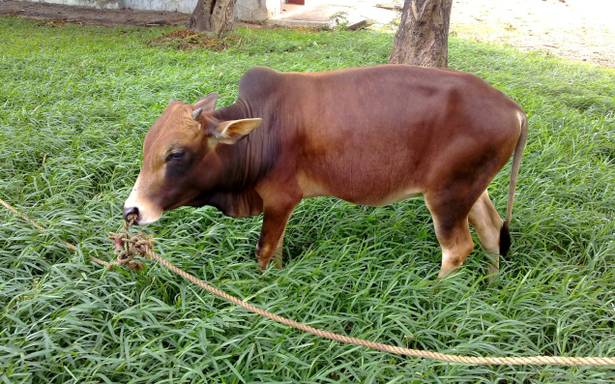** | - They are unique to South India and are distributed in and around Vaikom in the Kottayam, District of Kerala - Dairy breed - Small size (60-100cm) - They have a light brown or white coat - They are known as the smallest cattle breed that have high milk quality   (Iype S., 1996) |
| Brahman (Cambodia)  (National Animal Health and Production Research Institute, Phnom Penh, Cambodia) | 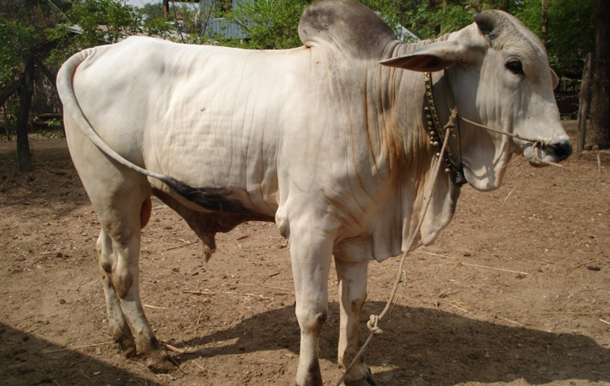 | - Globally distributed but mainly found in Siem Reap areas - Dual Purpose (Milk/Meat) - Large - Grey, white, or red coat, with distinct hump - Heat-tolerant, disease-resistant, good for beef production   (Namikawa , 2006) |
| Kdarm Red (Cambodia)  (National Animal Health and Production Research Institute, Phnom Penh, Cambodia) | 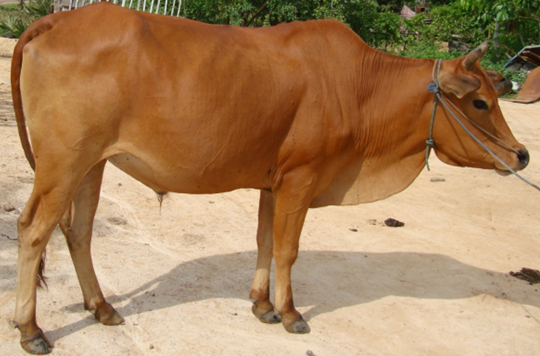 | - Found in all regions of Cambodia - Dual Purpose (Milk/Draught) - Medium sized - Reddish coat   (Namikawa T., 2006) |
| Kdarm White (Cambodia)  (National Animal Health and Production Research Institute, Phnom Penh, Cambodia) | 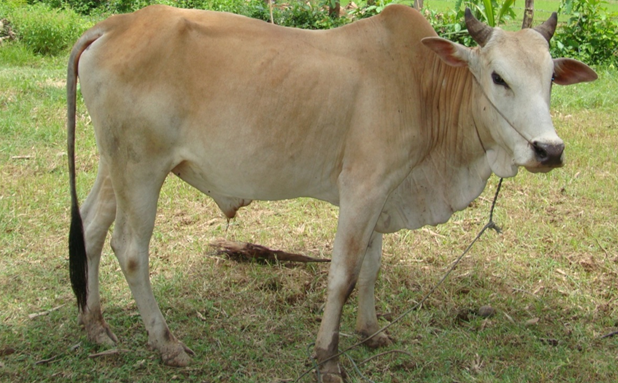 | - Found in all regions of Cambodia - Dual Purpose (Milk/Draught) - Medium sized - White coat   (Namikawa, 2006) |
| Batu Harak (Sri Lanka)  (Faculty of Veterinary Medicine and Animal Science, University of Peradeniya, Peradeniya, Sri Lanka) | 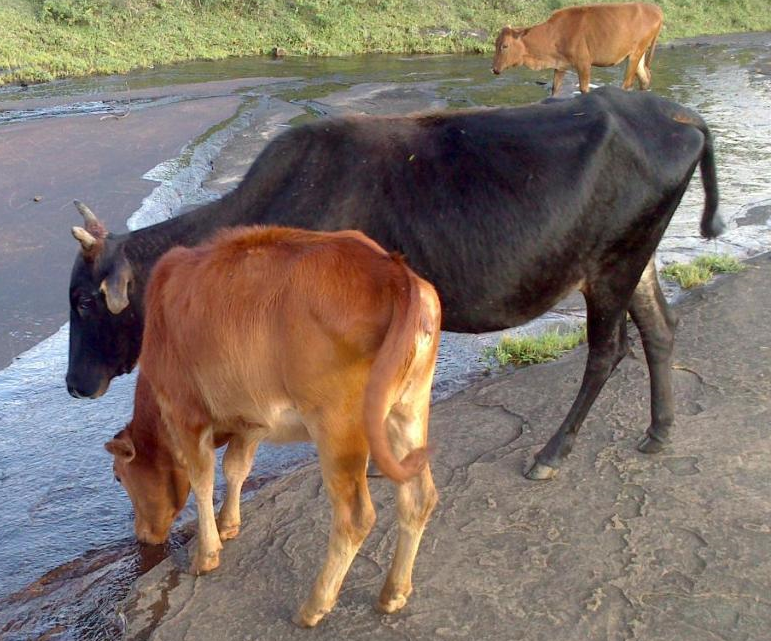 | - Found in the dry zone (Northern, Eastern and Southeastern part of Sri Lanka) - Draught - Medium sized - Grey or white coat - Known for high endurance in draught work   (Silva P, 2008) |
| Thawalam (Sri Lanka)  (Faculty of Veterinary Medicine and Animal Science, University of Peradeniya, Peradeniya, Sri Lanka) | 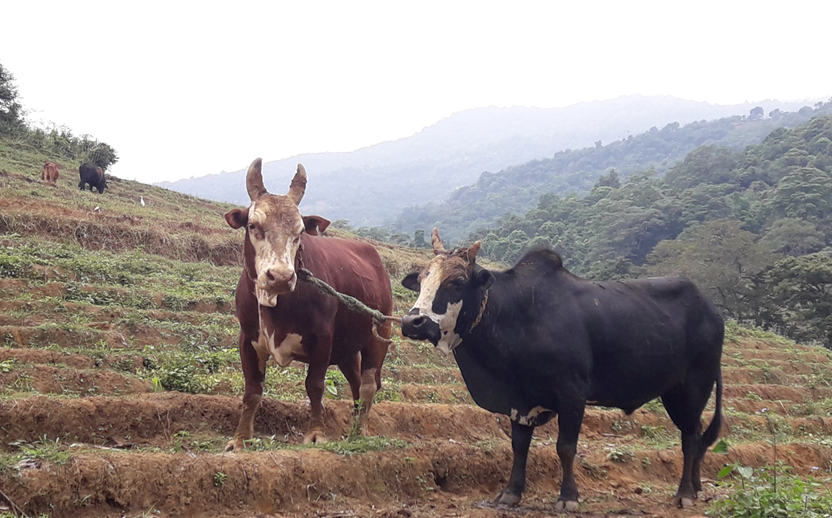 | - Found in Central and Uva provinces of Sri Lanka - Draught - Large sized - Brown or black coat - Used for heavy draught work   (Chandrasiri ADN, 2004) |
| White Cattle (Sri Lanka)  (Faculty of Veterinary Medicine and Animal Science, University of Peradeniya, Peradeniya, Sri Lanka) | 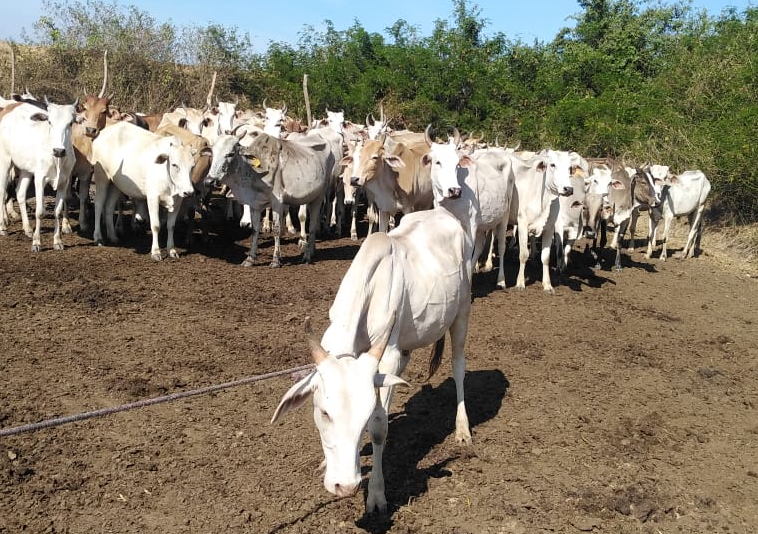 | - Found in the Eastern Province and the North Central Province of Sri Lanka - Draught - Medium sized - White coat - Primarily used in draught operations   (Shanjayan N, 2015) |
| Pyar Zein (Myanmar)  (Livestock Breeding and Veterinary Department, Yangon, Myanmar) | 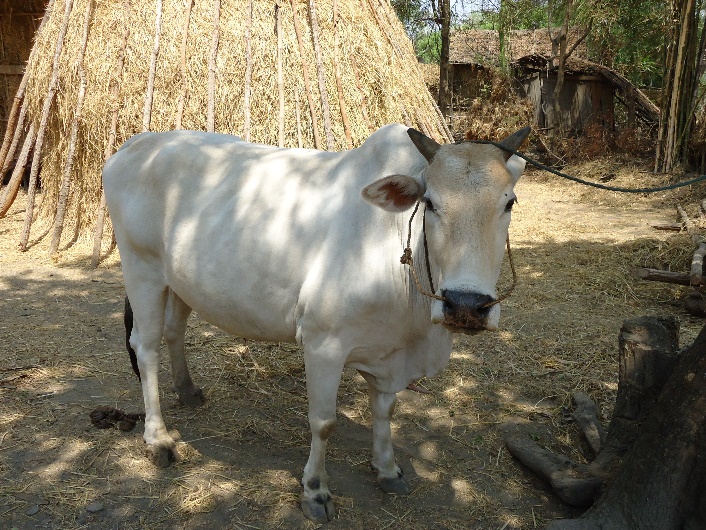 | - Found primarily in the central and southern regions of Myanmar, particularly around the Irrawaddy River delta and the coastal areas - Dual Purpose (Milk/Draught) - Medium sized - Grey or white coat - Known for good milk yield   (Win et al., 2020) |
| Shwe Ni Gyi  (Livestock Breeding and Veterinary Department, Yangon, Myanmar) | 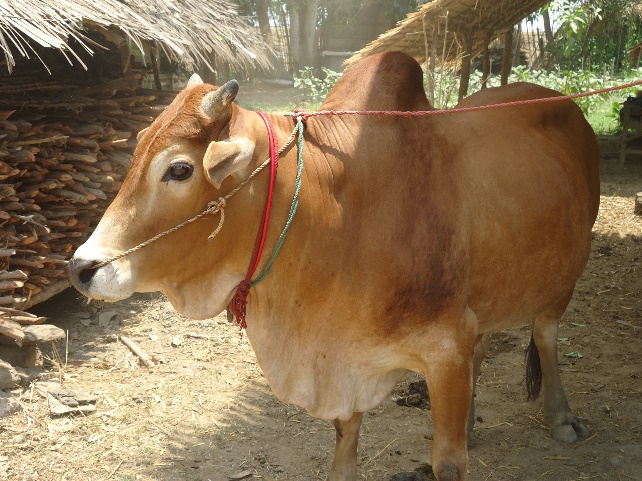 | - Found in all parts of Myanmar - Dual Purpose (Milk/Draught) - Medium - Reddish-brown coat - Adapted to local climates |
| Shwe Ni  (Livestock Breeding and Veterinary Department, Yangon, Myanmar) | 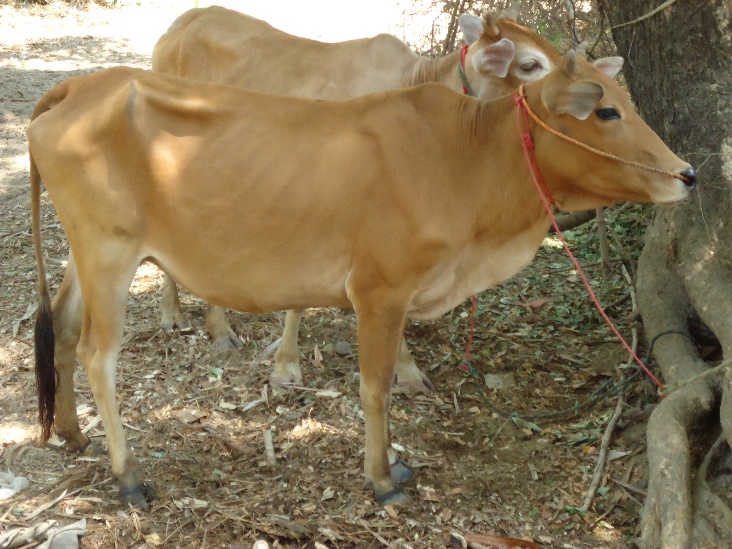 | - Primarily found in the central dry zone, specifically around the Pakokku Township in the Magway Region. - Dual Purpose (Milk/Draught) - Medium sized - Mostly red or pied, brown coat - Dewlap is larger in males than females - Used in rural areas for milk and draught   (Win et al., 2020) |
| Achai (Pakistani)  (Department of Biological Sciences, Virtual University of Pakistan, Islamabad, Pakistan) | 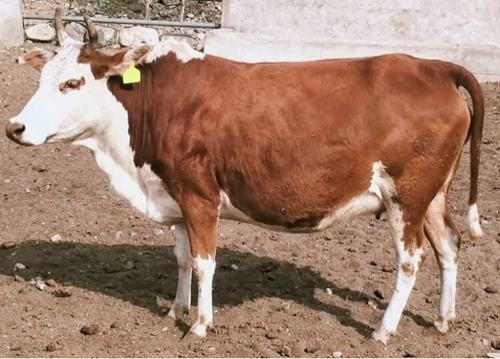 | - Found in northwestern Hindu Kush Mountains of the Khyber Pakhtunkhwa province - Dairy breed - Small sized - Coat colour is red, brown coat - Known for small size and milk yield   (Faraz, 2020) |
| Bhagnari (Pakistani)  (Department of Biological Sciences, Virtual University of Pakistan, Islamabad, Pakistan) | 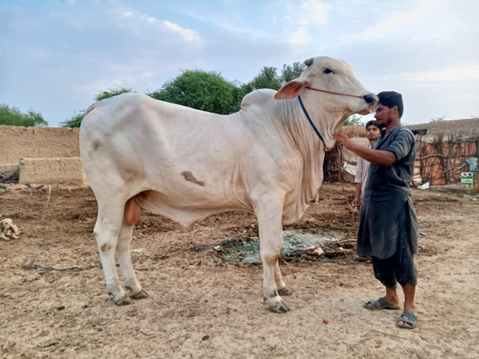 | - Found mainly in three districts, Bhag, Kacchi, and Ustta Muhammad in Balochistan province - Draught - Large sized - White or light grey coat - Known as a strong draught breed   (Faraz, 2020) |
| Cholistani (Pakistani)  (Department of Biological Sciences, Virtual University of Pakistan, Islamabad, Pakistan) | 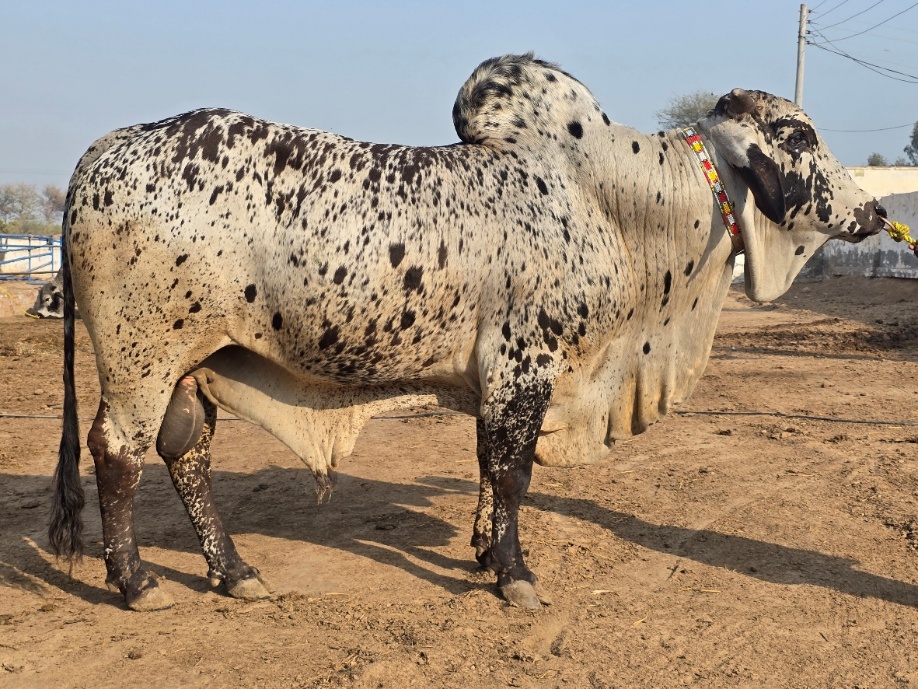 | - Found in Cholistan Desert region, specifically in the areas around Rahim Yar Khan, Bahawalpur, and Bahawalnagar in the Punjab province - Dual Purpose (Milk/Draught) - Large sized - Brown or grey coat - Favoured for draught work, adapted to local climates   (Faraz, 2020) |
| Dhani (Pakistani)  (Department of Biological Sciences, Virtual University of Pakistan, Islamabad, Pakistan) | 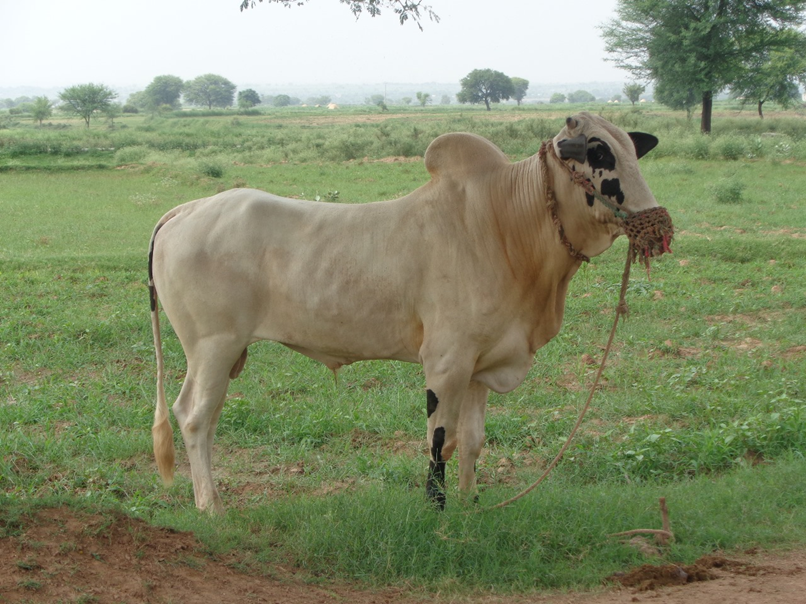 | - Mainly found in Attock, Chakwal, Rawalpindi, Jhelum, Mianwali, and Sargodha Districts of the Punjab province - Draught - Medium - Brown or grey coat - Used for draught work, adapted to local climates   (Faraz, 2020) |
| Dajal (Pakistani)  (Department of Biological Sciences, Virtual University of Pakistan, Islamabad, Pakistan) | 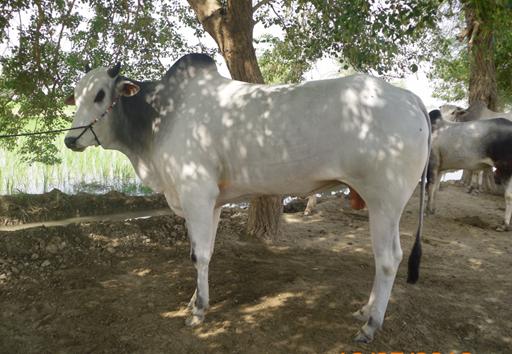 | - Found mainly in Dajal, Dera Ghazi Khan and Rajan Pur districts of Punjab province - Dual Purpose (Milk/Draught) - Small sized - White coat - Known for milk production and draught work   (Faraz, 2020) |
| Red Sindhi (Pakistani)  (Department of Biological Sciences, Virtual University of Pakistan, Islamabad, Pakistan) | 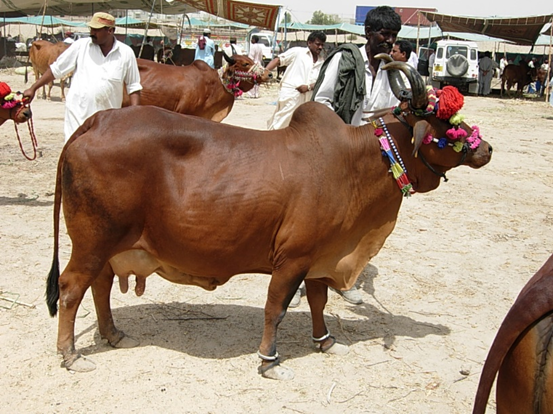 | - Found in Sindhi region particularly around Karachi and Hyderabad districts in Pakistan; - Dairy - Medium sized - Reddish-brown coat - Excellent dairy breed, high milk production   (Khan et al., 2008) |
| Sahiwal (Pakistani)  (Department of Biological Sciences, Virtual University of Pakistan, Islamabad, Pakistan) | 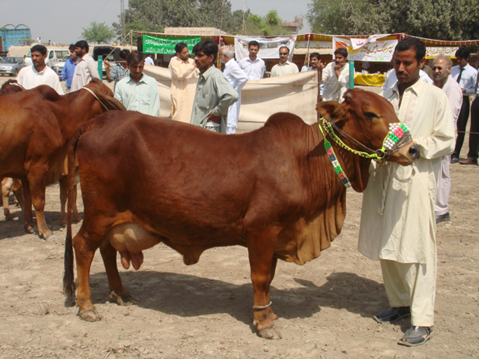 | - Transboundary breed - Found in Sahiwal district formerly part of the Montgomery district of Punjab in Pakistan; In India, the breed is distributed in Fazilka and Abohar region of Punjab, Sirsa district of Haryana and Sri Ganganagar district of Rajasthan - Dairy - Large sized - Reddish-brown coat, some white patches - Renowned dairy breed, high milk yield (Khan et al., 2008) |
| Tharparkar (Pakistani)  (Department of Biological Sciences, Virtual University of Pakistan, Islamabad, Pakistan) | 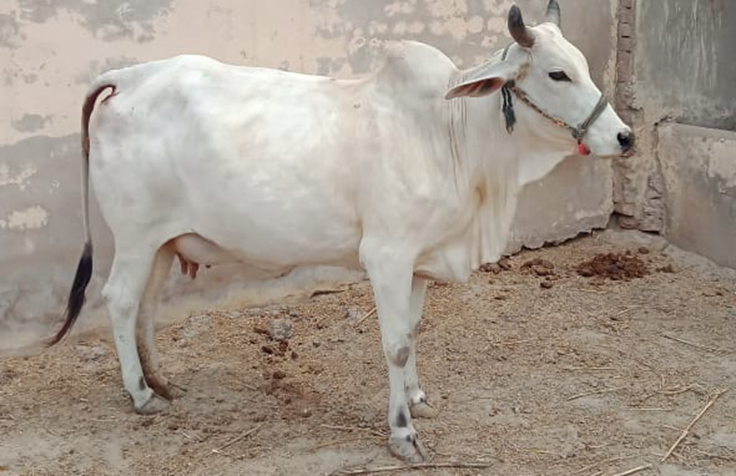 | - Transboundary breed - Found in Tharparkar District in Sindh province of Pakistan and in India, the breed is found along the Indo-Pak border covering western Rajasthan and up to Rann of Kutch in Gujarat - Dual Purpose (Milk/Draught) - Large sized - White or grey coat - Heat-tolerant, used for both milk and draught   (Khan et al., 2008) |

**REFERENCES**

Chandrasiri ADN. (2004). *The state of animal genetic resources in Sri Lanka. A joint publication of Department of Animal Production and Health and the office of the FAO representative in Sri Lanka and Maldives*.

Dongre VB, G. R. S. V. K. L. D. S. K. V. (2017). Present status and future prospects of Deoni Cattle. *Indian Journal of Animal Sciences*, *87*(7), 800–803.

Faraz, A. (2020). *Beef breeds of Pakistan*. https://www.researchgate.net/publication/338790137

Ganapathi, P. R. R. S. A. T. (2009). Distribution and Population Status of Bargur Cattle. *Indian Veterinary Journal*, *86*, 971–972.

Iype S. (1996). The Vechur Cattle of Kerala. *Animal Genetic Resources Information.*, *18*, 59–63.

Joshi N.R, P. R. W. (1953). Zebu cattle of India and Pakistan. FAO Agriculture Studies No. 19, Food and Agricultural Organization of the United Nations, Rome, Italy. pp. 14–29; 1953. . *Rome, Italy*, 14–29.

Kuralkar SV, B. P. C. M. K. P. D. SA. (2014). Phenotypic characteristics, production and reproduction performance of Deoni cattle in its native tract. . *Indian Journal of Animal Sciences,* *84*(1), 75–77.

Manomohan, V., Saravanan, R., Pichler, R., Murali, N., Sivakumar, K., Sudhakar, K., Nachiappan, R. K., & Periasamy, K. (2021). Legacy of draught cattle breeds of South India: Insights into population structure, genetic admixture and maternal origin. *PLoS ONE*, *16*(5 May). https://doi.org/10.1371/journal.pone.0246497

Namikawa T., M. H. , T. K. , N. K. , T. Y. ,. (2006). Coat-color variations of cattle observed in the fields of Cambodia, and withers-height and other traits in the native cattle subjected to further experimental analyses. *Rep. Soc. Res. Native Livestock*, *23*, 31–44.

Natarajan A, S. K. V. K. (2012). Productivity performance of Kangayam cattle. *Indian Journal of Animal Sciences.*, *82*(11), 1440–1441.

Nath NM. (1993). Punganur – The Miniature Bos indicus cattle. . *Animal Genetic Resources Information*, *11*, 54–59.

Pundir, R. K. , K. P. , S. P. K. , & V. V. (2009). Bargur cattle: status, characteristics and performance. . *The Indian Journal of Animal Sciences,* *79*(7), 800–803.

Rajendran R, R. T. T. A. N. M. T. P. (2008). Morphobiometrical characteristics and management of Umblachery cattle from coastal region of Tamilnadu, India. . *Livestock Research for Rural Development.*, 20–40.

Sajjad Khan, M., Rehman, Z.-U., Khan, M. A., & Ahmad, S. (2008). GENETIC RESOURCES AND DIVERSITY IN PAKISTANI CATTLE. In *Vet. J* (Vol. 28, Issue 2).

Shanjayan N, L. L. (2015). A morphometric analysis of indigenous white cattle (Thamankaduwa breed) in the Eastern province of Sri Lanka with a description of a novel character. *5th International Symposium-IntSym*.

Silva P, H. H. C. A. (2008). Indigenous cattle types and production systems in Sri Lanka. *Economic Review*, *34*, 25–28.

Singh PK, P. R. A. S. K. S. G. M. A. K. (2008). Phenotypic characterization and performance evaluation of Hallikar cattle in its native tract. *Indian Journal of Animal Sciences*, *78*(2), 211–214.

Singh PK, P. R. K. P. V. P. (2012). Management and physical features of migratory Pulikulam cattle of Tamil Nadu. *Indian Journal of Animal Sciences.*, *82*(12), 1587–1590.

Ware. (1942). A further survey of some important breeds of cattle and buffaloes in India. . *Imperial Council of Agricultural Research.*

Win S.H, Htut  A.Y, & Aye M.A. (2020). On-farm phenotypic characterization of Shwe Ni and Pyar Zein in Salin and Pakokku Township. *Myan. J. Vet. Anim. Sci*, *1*(1). https://doi.org/10.1002/0000.12345

Supplementary Table ST2: List of genes associated with highly differentiated SNP loci (top 05%) between dairy and draught type zebu cattle along with Gene Ontology: Biological Process and KEGG pathways

| **Draught vs Dairy** |  |  |  |  |
| --- | --- | --- | --- | --- |
| **Database** | **p-Value** | **Method** | **Input** | **Description** |
| GO: BP | 0.0064 | FST | CD1D, CD1A, CD1B, CD1E, CD1B5 | Immune response |
| GO: BP | 0.011 | FST | XBP1, CSH2, GH1, GHRH, PRL, PRP3, PRP-VII | Milk production |
| GO: BP | 0.013 | FST | TIMP2, AHSG, FETUB,HRG, KNG1, SERPINB1, SERPINB10, SERPINB12, SERPINB2, SERPINB5, SERPINB7, SERPINB9, SERPINE2, SERPINB6 | Immune response |
| GO: BP | 0.015 | FST | BPIFA1, CXCL8, H2BC11, S100A12, GRO1, CXCL2, CXCL3, CXCL5, CHGA, HRG, PGLYRP1, PGLYRP4 | Immuneresponse |
| GO: BP | 0.016 | FST | CD1D, CD1A, CD1B, CD1E, CD1B5 | Immune response |
| GO: BP | 0.025 | FST | EYA1, SIX1, HOXB1, HOXB2, HOXB3, HOXB4, HOXB5, HOXB6, HOXB7, HOXB8, HOXB9,MEGF8, ZEB1 | Physiology and Growth |
| GO: BP | 0.028 | FST | BCL2, TOP1, GATA4, JUN, TIGAE, BLOC1S3, CTNNB1, DRD2, EMX2, GCLM, NFATC2, p2RX7, RPP21, SRp68, SLC1A2, THBS1, TGFB2, TP53I13, VAV3 | Physiology, Adaptation |
| GO: BP | 0.032 | FST | C1QTNF9, ACOX1, ALOX12, ALOX15, PRKAA1 | Physiology: mitochondrial aerobic processes (energy) |
| GO: BP | 0.033 | FST | BEST3, BEST4, CLCA1, CLCA2, CLCA4, CLCA3, CLIC5, GABRA4, GABRG1, GLRA1, PACC1, SLC26A8, SLC4A1, TTYH3 | Physiology,regulation of extracellular volume and blood pressure |
| GO: BP | 0.033 | FST | CCR1, CCR6, CCR9, CXCCR2, CXCR6, RCAN3, TNFSF11, XCR1, ACKR3, BHLHA15, CXCR1, PLCG2, PPP1R9B, P2RX4, RCAN2, SPHK1, SAMD14 | Physiology: signal transduction, regulation of skeletal muscle contraction |
| GO: BP | 0.038 | FST | CLEC7A, DDRGK1, DHX9, FER, NLRC4, RAB7B, RBCK1, TRAF6, TNFSF11, CIB1, CAT, CLOCK, CLU, CRNN, IRAK2, IRAK3, IL18RAP, PLCG2, PRL, PRKD1, RIPK1, RIPK2, RNF25, SLCO3A1, SPHK1, TRAPPC9, TRIM13, TRIM14, TRIM15, TRIm8, UBE2V1 | Physiology: regulation of various physiological processes. Innate and adaptive immune response |
| GO: BP | 0.042 | FST | ACAN, CANT1, CHST10, CHST11, CHST12, FOXL1, IGF1 | Aiding in wound healing, embryo development, Lubricating fluid in joints |
| GO: BP | 0.042 | FST | BLK, EPHB2, FER, FES, KIT, MERTK, SHC1, SHC3, SRC, CSF1R, EGFR, FGFR1, FGFR2, FGFR4, FRS2, INSR, KDR, LMTK2, NGF, NTRK3, PDGFRA, PTK2, PTK6, PTPRT, STAP1, SRMS, SAMD10, SMAd12, TIE1 | Signal transduction |
| GO: BP | 0.045 | FST | BCL2, CLEC7A, CD93, FAT3, LPP, SHC1, CDH2, CDH23, CTNNB1, CTNND2, CNTN1,DSC1, DSC2, DSC3, DSG1, DSG3, DSG4, ELMO2, EGFR, NEO1, NEGR1, PKP1, PKP4, PDPN, ROBO4, TCAM1, VNN1 | Dynamic changes in cell arrangements |
| GO: BP | 0.046 | FST | BRAT1, CLK2, COP1, EYA1, ABRAXAS1, AEN, MTA1, NHEJ1, NABP1, RFWD3, UIMC1 | cellular abiotic stimulus (Adaptation) |
| GO: BP | 0.048 | FST | BCAR3, RAF1, SHC1, FOXO1, GSK3A, GPLD1, GRB14, GRB2, PHIP, PTPN1, PTPRa, PDK2, SLCA28, SOGA1, STXBB4 | Regulates glucose, lipid, and energy homeostasis, predominantly via action on liver, skeletal muscle, and adipose tissue |
| GO: BP | 0.048 | FST | AQP10, AQP2, AQP3, AQP4, AQP5, AQP7 |  |
| GO: BP | 0.048 | FST | SIX1, SIX4, FRS2, PRKDC, SERPINB5, UHRF1 | Physiology |
| GO: BP | 0.048 | FST | H2BC11, S100A12, CHGA, C6, C7, C9, PGLYRP1, PGLYRP4 |  |
| GO: BP | 0.048 | FST | FAIM2, RPGRIP1L, ATRN, CNTN1, CDK5R2, EN1, GBX2, PTPRS | Nervous system development |
| GO: BP | 0.049 | FST | 50 genes (DDX4, FKBP6, GLI1, H1-6, KIT, MERTK, MYCBPAP, GALNT3, SLC25A31, SLC26A8, SPATA20, SPATA6L, TDRP, TPPP2, TDRD1, TDRD5, UBR2, USP42, ZNF296) | Reproduction |
| KEGG_PATHWAY | 0.0034 | FST | AKT3, BRAF, BCL2, BCL2L1, RAF1, SHC1, SHC3, RC, EGFR, EIF4EBP1, FGFR2, GAS6, GRB2, IGF1, IL6R, KDR, NRG2, NF1, PTEN, PIK3CD, PLCG1, PLCG2, PDGFC, PDGFRA, PDGFA, TGFA | Cell homeostasis |
| KEGG_PATHWAY | 0.0047 | FST | 51 genes ( CTNNB1, CSF1R, DRD2, EFNA1, EFNA3, EFNA4, EGFR, FGF23, ID1, IGF1, INSR, ITGA2B, KDR, MAPK13, MAPK14, NGF, PIK3CD, PLCG1, PDGFC, PDGFR3) | Cell physiology and morphology |
| KEGG_PATHWAY | 0.0049 | FST | 42 genes (AKT3, CXCL8, CXCR2, GNA12, GNAS, KITLG, KIT, RAF1, RAPGEF3, PLCG1, PLCG2, PLD2, PLPP1,PDGFC, PDGFRA, PDGFA, SPHK1 ) | Physiology, skeletal muscle mass size regulation |
| KEGG_PATHWAY | 0.0057 | FST | CDS1, CDS2, PLA2G2D1, DGKH, DGKG, DGK1, DGKQ, ETNPPL, GPAT3, GPAM, GPD2, LPIN3, LCLAT1, LPCAT1, LPCAT2, LYPLA2, PNPLA6, PNPLA7, PTDSS1, PLA2G2C, PLA2G2E, PLA2G2F, PLA2G4A, PLA2G5, PLD4, PLD2, PLPP1, PLPP5 | Stability against hypoxic stress, energy stress |
| KEGG_PATHWAY | 0.0058 | FST | FREM1, FRAS1, CHAD, COL1A1, COL6A1, GP9, GP1BA, HMMR, ITGA10, ITGA11, ITGA2B, ITGA3, ITGA6, ITGA8, ITGAV, ITGB4, LAMA1, LAMC1, LAMC3, NPNT, SV2B, SV2C, SDC4, THBS1, THBS3 | Cell physiology |
| KEGG_PATHWAY | 0.014 | FST | AKT3, BRAF, BCL2, JUN, RAP1B, RAC2, RAF1, RASGRF1, SHC1, SHC3, SRC, BIRC2, BIRC3, CAPN2, CTNNB1, CHAD, COL1A1, COL6A1, CCND2, EGFR, GRB2, IGF1, ITGA10, ITGA11, ITGA2B, ITGA3, ITGA6, ITGA8, ITGAV, ITGB4, ITGB6, KDR, LAMA1, LAMC3; MAPK10, MYL9, MYLK3, MYLK4, PTEN, PIK3CD, PDGFC, PDGFRA, PDGFA, PTK2, RELN, TLN2, THBS1, THBS3, VAV3 | Cell structure |
| KEGG_PATHWAY | 0.024 | FST | AKT3, BRAF, BCL2, JUN, RAP1B, RAF1, SHC1, SHC3, TRAF6, CAMK4, CALML4, FRS2, GRB2, IRAK2, IRAK3, IRAK4, MAPK10, MAPK13, MAPK14, MPA2K5, MAP3K1, MAP3K3, NGF, NTRK3, PIK3CD, PLCG1, PLCG2, RIPK2, RPS6KA1, RPS6KA2, SORT1 | Signal transduction to various cascades i.e JAT-STAT, MAPK |
| KEGG_PATHWAY | 0.024 | FST | ABL2, AKT3, BCL2L1, GNG13, GNG4, GNG5, KITLG, KIT, RAP1B, RASA3, RASAL2, RAC2, RAF1, RALGAPB, RASGRF1, SHC1, SHC3, TBK1, PLA2G2D1, CALML4, CSF1R, EFNA1, EFNA3, EFNA4, EGFR, FGFR1, FGFR2, FGFR4, GRB2, IGF1, INSR, KDR, MAPK10, NGF, NF1, PIK3CD, PLA2G2C, PLA2G2E, PLA2G2F, PLA2G4A, PLA2G5,PLCG1, PLCG2, PLD2, PDGFC, PLD2, PDGFC, PDGFRA, PDGFA, RGL1, STK4, TGFA | Cell Physiology |
| KEGG_PATHWAY | 0.026 | FST | GNAI1, GNAO1, GNG13, GNG4, GNG5, GABARAPL1, SRC, ADCZ1, ADCZ2, ADCZ6, CACNA1B, CACNA1S, GABRR3, GABRA2, GABRA4, GABRB1, GABRG1, GABBR2, GLS, PLCL1, SLC32A1, SLC38A1, SLC38A2 |  |
| KEGG_PATHWAY | 0.027 | FST | AKT3, BRAF, BCL2, E2F1, GPER1, GNAS, JUN, RAF1, SHC1, SHC3, SRC, ADCY1, ADCY2, ADCY6, EGFR, GRB2, HBEGF, IGF1, JAG2, MMP2, MAPK10, MAPK13, MAPK14, NCOA3, PIK3CD, PTK2 | Reproduction, milk production, Thermoregulation |
| KEGG_PATHWAY | 0.029 | FST | BNIP3L, BCL2L1, CCZ1, E2F1, GABARAPL1, JUN, OPA1, RAB7B, SRC, TBK1, AMFR, ATG9A, CALCOCO2, CSNK2A1, CSNK2A2, MITF, MARCHF5, MTX1, MAP1LC3A, MAP1LC3B, MAPK10, OPTN, RHOT2, SIAH1, TOMM20, TOMM40, USP15 | Longevity |
| KEGG_PATHWAY | 0.029 | FST | GNAS, ADCY1, ADCY2, ADCY6, ADRB1, CACNA2D3, CACNA2D3, CACNB3, DES, DTNA, IGF1, ITGA10, ITGA11, ITGA2B, ITGA3, ITGA6, ITGA8, ITGAV, ITGB4, ITGB6, LAMA1, SGCA, SGCG, SSPN, SNTA1, TGFB2, TPM3 | Abnormality in the myocardium |
| KEGG_PATHWAY | 0.039 | FST | GNAS, JUN, RAF1, SRC, ADCY1, ADCY2, ADCY6, CACNA1S, EGFR, GNRHR, GRB2, HBEGF, ITPR1, ITPR2, MMP14, MMP2, MAPK10, MAPK13, MAPK14, MAP3K1, MAP3K3, PLA2G4A, PLD2 | Reproductive system |
| KEGG_PATHWAY | 0.040 | FST | AKAP13, BRAF, BCL2, GNA12, GNAI1, GNAS, RAF1, ARHGEF1, TNFSF11, ADCY1, ADCY2, ADCY6, ARRB2, CREB3L2, CYP24A1, EGFR, FGF23, FGFR1, HBEGF, ITPR1, ITPR2, MMP14, MMP15, MMP24, NR4A2, PLD2, SLC34A1, VDR | Calcium and phosphorus homeostasis. Bone resorption |
| KEGG_PATHWAY | 0.045 | FST | AKT3, GNAI1, GNAS, POU1F1, RAF1, SHC1, SHC3, ADCY1, ADCY2, ADCY6, CREB3L2, CACNA1S, GRB2, GH1, GHRH, ITPR1, ITPR2, IGF1, IGFBP3, MAPK10, MAPK13, MAPK14, MAP3K1, PIK3CD, PLCG1, PLCG2, PTK2, STAT1, SSTR3, SSTR5 | Physiology and Growth |
| KEGG_PATHWAY | 0.046 | FST | AKT3, BRAF, GNAI1, RAF1, ADCY1, ADCY2, ADCY6, ANAPC1, ANAPC5, CDC16, CDC25B, CPEB2, CPEB3, HSP90AA1, IGF1, MAPK10, MAPK13, MAPK14, MAD1L1, PIK3CD, RPS6KA1, RPS6KA2, STK10 | Reproduction and Fertility |
| KEGG_PATHWAY | 0.047 | FST | 70 genes (AKT3, BCL2, BCL2L1, GNG13,PPP2R2A, PTK2, RELN, SGK1, SGK2, THBS1, THBS3) | Metabolism and Growth |
| KEGG_PATHWAY | 0.048 | FST | 36 genes ( CXCL3, HSP90AA1, ITPR1, ITPR2, IRAK4, MAP1LC3A, MAP1LC3B, MAVS, MAPK10, MAPK13, MAPK14, P2RX7, RIPK1, RIPK2, RNASEL, STAT1, TXNIP ) | Immune response, thermoregulation |

Supplementary Table ST3: List of genes associated with highly differentiated SNP loci (top 05%) between large and small stature cattle along with Gene Ontology: Biological Process and KEGG pathways

| **Small statured vs Normal Size** |  |  |  |  |  |  |
| --- | --- | --- | --- | --- | --- | --- |
| **Term** | **Database** | ***p*-Value** | **Fischer exact** | **Method** | **Input** | **Description** |
| response to peptide hormone | GO: BP | 8.1E-4 | 6.2E-5 | FST | REG3A, REG3G, STAT1, STAT3, STAT5A, STAT5B | response to insect attacks or severe mechanical wounding. |
| regulation of heart contraction | GO: BP | 1.4E-3 | 1.3E-4 | FST | HOPX, CHRM2, GJA1, HBEGF, THRB, TH | Physiology |
| calcium-mediated signaling | GO: BP | 2.1E-3 | 6.3E-4 | FST | PDPK1, CCR1, CCR10, CCR2, CCR3, CCR5, CCRL2, ACKR3, ACKR4, EDNRB, KSR2, NCALD, NMUR1 | Skeletal muscle |
| positive regulation of intrinsic apoptotic signaling pathway | GO: BP | 2.4E-3 | 5.2E-4 | FST | BID, DDIT3, NHERF1, S100A8, S100A9, BECN1, CLU, SIAH1, TP53 | Homeostasis |
| exocytosis | GO: BP | 2.7E-3 | 9.9E-4 | FST | MIA3, WASHC3, CPLANE2, EXOC1L, EXOC1, MICAL3, KCNB1, SYT16, SYTL3, SZCN, STX1A, STX1B, STX2, STX4, TRIM72, UNC13B | Immune response |
| lysosomal transport | GO: BP | 6.7E-3 | 1.0E-3 | FST | ATP13A2, VPS52, GRN, HGSNAT, LYSET, PSAP |  |
| phospholipid scrambling | GO: BP | 7.5E-3 | 8.2E-4 | FST | PLSCR1, PLSCR2, PLSCR3, PLSCR5, SLC4A1 |  |
| maintenance of gastrointestinal epithelium | GO: BP | 7.5E-3 | 8.2E-4 | FST | CRACD, NOD2, TFF1, TFF2, TFF3 | Gut homeostasis |
| protein localization to cell surface | GO: BP | 8.1E-3 | 1.9E-3 | FST | ANGPT1, CTNNB1, FGF10, GGA1, GGA3, NLGN2, PIGK, STX4 |  |
| cell differentiation | GO: BP | 1.0E-2 | 6.8E-3 | FST | BCL7B, CXCL17, DDX41, DMRTC2, ETV3L, ETV3, ETV4, FKBP6, GNA12, NKX1-1, PBXIP1, PDLIM7, RBL1, RBL2, SMAD7, SRC, SOX12, SOX15, SOX18, ANGPT1, C15H11orf34, FGF10, FLNB, FSTL4, FOXB2, FOXL1, GRB2, ID2, KRTAP4-7, KRTAP9-2, NTRK1, NOTCH2, NR1D2, NR2E3, NR2F2, PPDPF, PTK6, PURA, RXRB, RXRG, RNF114, SEMA4C, SEMA6D, SLC26A8, SPEM1, SPATA6, SRMS, STX2, THRB, TBCB, TNK1, ZNF750, ZFPM2 |  |
| cell division | GO: BP | 1.1E-2 | 5.8E-3 | FST | CKS1B, DIS3L2, DSN1, FBXO5, HAUS1, NDC80, RAN, ACTR8, ANAPC5, BECN1, BOD1, CDC26, CDC7, CDT1, CCDC124, CCNB1, CCNF, CCNT1, MAEA, MCMBP, NCAPH, PARD3, PARD6B, SPICE1, SYCP3, TEDC2, ZW10 |  |
| negative regulation of endothelial cell apoptotic process | GO: BP | 1.1E-2 | 2.5E-3 | FST | PDPK1, BRAF, ANGPT1, KDR, NDNF, PAK4, RAMP2 |  |
| embryonic skeletal system morphogenesis | GO: BP | 1.2E-2 | 3.4E-3 | FST | HOXB1, HOXB2, HOXB3, HOXB4, HOXB5, HOXB6, HOXB7, HOXB8, HOXB9 | Skeletal muscle |
| bicarbonate transport | GO: BP | 1.2E-2 | 2.2E-3 | FST | SLC26A8, SLC39A12, SLC4A1, SLC4A5, SLC4A7, SLC4A9 |  |
| regulation of actin cytoskeleton organization | GO: BP | 1.4E-2 | 4.8E-3 | FST | DIXDDC1, IQGAP2, MLST8, RND1, RND2, ARHGEF19, SH3BP1, CDK10, CDK5R1, FZD10, RHOF |  |
| negative regulation of cell migration | GO: BP | 1.5E-2 | 6.3E-3 | FST | ADAM15, GTPBP4, NHERF1, SRGAP1, TCAF1, ABHD6, CLDN3, CYP1B1, DPEP1, DRD2, EMILIN2, MITF, OSBPL8, PTPRT, ZMYND8 |  |
| anterior/posterior pattern specification | GO: BP | 1.5E-2 | 6.3E-3 | FST | YY1, EMX2, HELT, HOXB1, HOXB2, HOXB3, HOXB4, HOXB5, HOXB6, HOXB7, HOXB8, HOXB9, NR2F2, PCSK5, RING1 |  |
| transmembrane receptor protein tyrosine kinase signaling pathway | GO: BP | 1.6E-2 | 7.4E-3 | FST | EPHA2, EPHA6, MERTK, SHC1, SHC2, SRC, DOK3, ERBB2, FRS2, INSRR, KDR, NTRK1, PTK6, PTPRT, SRMS, SMAD10, TNK1 |  |
| thrombin-activated receptor signaling pathway | GO: BP | 1.7E-2 | 1.5E-3 | FST | F2RL1, IQGAP2, F2RL2, F2R | Immune response |
| cellular zinc ion homeostasis | GO: BP | 1.7E-2 | 4.1E-3 | FST | ATP13A2, MT2A, MT1A, SLC30A5, SLC39A12, SLC39A6, SLC39A7 |  |
| negative regulation of transforming growth factor beta receptor signaling pathway | GO: BP | 1.8E-2 | 6.5E-3 | FST | PDPK1, LEMD3, PRDM16, RASL11B, SMAD7, CHST11, GLG1, SNX25, TGFB1I1, TP53, ZNF451 | Homeostasis |
| sensory perception of sound | GO: BP | 1.8E-2 | 8.5E-3 | FST | ATP6VOA4, ATP2B2, DDIT3, NHERF1, PKHD1L1, USH1G, CDH23, COL11A2, CRYM, HEXA, HOMER2, MYO7B, OTOA, SOBP, THRB, TMIE, TMPRSS3, WFS1 | Importancy in physic+zal structure |
| protein transport | GO: BP | 1.8E-2 | 1.1E-2 | FST | ARFGEF1, ARFGEF2, ARL3, DOP1A, FRAS1, MIA3, NSF, NECAP2, VPS52, WASHC3, ARRDC2, CHMP1A, CPLANE2, COG4, GOSR2, GGA1, JAKMIP1, KLHL20, KTN1, LMAN2L, MTX1, MYO1D, NUP50, NUP85, PIK3R2, RAMP2, SCAMP3, STAM, SLC15A4, SNX18, SNX20, SNX8, TIMM50, TIMM8B, TMED3 |  |
| cerebellum development | GO: BP | 2.0E-2 | 4.1E-3 | FST | LMX1A, RPGRIP1L, CDK5RI, PDSS2, SEMA4C, TP53 |  |
| cell-cell adhesion via plasma-membrane adhesion molecules | GO: BP | 2.0E-2 | 5.8E-3 | FST | CD177, ADGRL3, CDH11, CDH13, CDH15, CDH18, FGFRL1, MMP24 |  |
| cytoplasmic mRNA processing body assembly | GO: BP | 2.1E-2 | 3.4E-3 | FST | LIMD1, LSM14A, LSM4, DYNC1H1, RC3H1 |  |
| positive regulation of sperm capacitation | GO: BP | 2.1E-2 | 6.4E-4 | FST | BSP1, BSP3, BSP5 | Reproduction (sperm binder) |
| canonical Wnt signaling pathway involved in osteoblast differentiation | GO: BP | 2.1E-2 | 6.4E-4 | FST | WNT3, CTNNB1, FZD1 | Skeletal muscle |
| metanephros morphogenesis | GO: BP | 2.1E-2 | 6.4E-4 | FST | FRAS1, CTNNB1, FGF10 |  |
| regulation of sodium ion transmembrane transport | GO: BP | 2.1E-2 | 6.4E-4 | FST | BPIFA1, SCN5A, SNTA1 |  |
| canonical Wnt signaling pathway involved in mesenchymal stem cell differentiation | GO: BP | 2.1E-2 | 6.4E-4 | FST | WNT3, CTNNB1, FZD1 |  |
| cell communication by chemical coupling | GO: BP | 2.1E-2 | 6.4E-4 | FST | PDLIM7, DBN1, GJA1 |  |
| intracellular signal transduction | GO: BP | 2.2E-2 | 1.5E-2 | FST | PDPK1, ARFGEF2, BRAF, CDC42BPA, JAK3, MKNK1, MOK, NUAK1, RAB40B, ARHGAP29, ARHGEF4, ARHGEF5, STAC3, SHC1, SHC2, SRC, WNK4, ADCY2, ADCY6, ADCY7, ASB16, DCDC1, DCLK2, GUCY2D, IRAK3, MAST3, MAPK10, MAPK13, MAPK14, MYO 9A, NRG2, NOD2, PAK4, PREX1, PLEKHM1, PPP1R1B, RGS14, RGS7, STK38L, SGK2, SGK3, TGFBR3, UNC13B |  |
| proteasome-mediated ubiquitin-dependent protein catabolic process | GO: BP | 2.3E-2 | 1.3E-2 | FST | COP1, DDIT3, FBXL19, HERC2, RBCK1, TOPORS, BFAR, CTNNB1, CLOCK, GBA1, KLHL20, MAEA, KCTD2, KCTD5, PSMC4, PPP2R5C, RNF186, RNF34, SIAH1, TRIM72, UBE3D, VCP |  |
| axon guidance | GO: BP | 2.4E-2 | 1.2E-2 | FST | BOC, ENAH, EPHA2, EPHA6, KLF7, LMX1A, ARHGEF25, WNT3, CRMP1, CDK5R1, EFNA1, EFNA3, EFNA4, EFNB3, KIF5A, PALLD, SEMA4C, SEMA6D, SLIT3, TTC8 |  |
| ephrin receptor signaling pathway | GO: BP | 2.4E-2 | 5.4E-3 | FST | ANKS1B, CDK5R1, EFNA1, EFNA3, EFNA4, EFNB3 |  |
| cytoplasmic microtubule organization | GO: BP | 2.5E-2 | 8.3E-3 | FST | CLIP3, DCTN1, DYNC1H1, DST, STMN3, TUBG1, TUBG2, TUBGCP3, TUBGCP5 |  |
| negative regulation of T-helper 17 cell differentiation | GO: BP | 2.6E-2 | 2.9E-3 | FST | SMAD7, ASCL2, RC3H1, ZBTB7B |  |
| glutathione biosynthetic process | GO: BP | 2.6E-2 | 2.9E-3 | FST | GGT7, GCLM, GSS, SLC1A2 |  |
| positive regulation of mitochondrial translation | GO: BP | 2.7E-2 | 4.8E-3 | FST | CDK5RAP1, FASTKD2, FASTKD3, MPV17L2, COA3 |  |
| phospholipid transport | GO: BP | 2.9E-2 | 8.1E-3 | FST | ABCG8, ATP8A1, ATP9A, PRELID1, MTTP, OSBPL8, PCTP |  |
| intrinsic apoptotic signaling pathway in response to DNA damage by p53 class mediator | GO: BP | 2.9E-2 | 8.1E-3 | FST | ATAD5, PYCARD, TOPORS, RPS27L, TP53, TP73, USP28 |  |
| cochlea development | GO: BP | 3.4E-2 | 6.8E-3 | FST | ADAM10, CECR2, RPGRIP1L, KCNQ1, SOBP |  |
| activation of cysteine-type endopeptidase activity involved in apoptotic process | GO: BP | 3.5E-2 | 1.4E-2 | FST | BID, FASLG, PYCARD, S100A8, S100A9, CASP8AP2, F2R, HIP1, STAT1, VCP |  |
| glucose 6-phosphate metabolic process | GO: BP | 3.6E-2 | 4.8E-3 | FST | G6PC1, G6PC3, HK2 |  |
| positive regulation of GTPase activity | GO: BP | 3.7E-2 | 1.9E-2 | FST | ADAP2, F2RL1, IQSEC1, RAB11FIP2, SH3BP1, TBC1D20, TSC2, F2R, ERBB2, FZD10, MYO9A, NTRK1, PREX1, RGS10, RGS14, RGS7, SNX18, TGM2 |  |
| Golgi organization | GO: BP | 3.7E-2 | 1.8E-2 | FST | ARFGEF1, FBXW8, RAB43, ARHGAP21, TBC1D20, ATL2, COG4, GOLGA5, LMAN1, LMAN2L, LMAN2, TMED9, TMED3, ZW10 |  |
| response to cadmium ion | GO: BP | 3.9E-2 | 2.4E-3 | FST | HAAO, GSS, SLC34A1 |  |
| JAK-STAT cascade involved in growth hormone signaling pathway | GO: BP | 3.9E-2 | 2.4E-3 | FST | STAT3, STAT5A, STAT5B | Physical growth |
| positive regulation of cytosolic calcium ion concentration involved in phospholipase C-activating G-protein coupled signaling pathway | GO: BP | 4.0E-2 | 1.2E-2 | FST | F2RL1, GPR17, GPR65, F2RL2, F2R, DRD2, OPRL1 |  |
| vesicle fusion | GO: BP | 4.1E-2 | 1.4E-2 | FST | EEA1, FER1L5, GOSR2, SYT4, STX1A, STX1B, STX2, STX4 |  |
| positive regulation of histone H3-K4 methylation | GO: BP | 4.3E-2 | 1.1E-2 | FST | BRCA1, KANSL2, KANSL3, AUTS2, CTNNB1, KAT8 |  |
| ion homeostasis | GO: BP | 4.3E-2 | 9.2E-3 | FST | WNK4, SLC4A1, SLC4A5, SLC4A7, SLC4A9 |  |
| adherens junction assembly | GO: BP | 4.8E-2 | 7.5E-3 | FST | SMAD7, CTNNB1, RAMP2, TBCD |  |
| positive regulation of stem cell differentiation | GO: BP | 4.8E-2 | 7.5E-3 | FST | HOXB4, NUDT21, PTN, TCF15 |  |
| regulation of T cell differentiation | GO: BP | 4.8E-2 | 7.5E-3 | FST | BRAF, CCR2, PRELID1, BOLA-DOA |  |
| cAMP biosynthetic process | GO: BP | 4.8E-2 | 7.5E-3 | FST | ADCY2, ADCY6, ADCY7 |  |
| Endocrine resistance | KEGG_PATHWAY | 5.7E-6 | 1.6E-6 | FST | BRAF, E2F1, MDM2, SHC1, SHC2, SRC, ADCY2, ADCY6, ADCY7, CDKN2C, DLL3, ERBB2, GRB2, HBEGF, MMP2, MED1, MAPK10, MAPK13, MPK14, NOTCH2, NCOA3, PIK3R2,TP53 |  |
| Prolactin signaling pathway | KEGG_PATHWAY | 1.1E-3 | 3.7E-4 | FST | SHC1, SHC2, SRC, CSH2, CYP17A2, GRB2, INS, MAPK10, MAPK13, MPK14, PIK3R2, STAT1, STAT3, STAT5A, STAT5B, TH | Milk production |
| Rap1 signaling pathway | KEGG_PATHWAY | 3.0E-3 | 1.6E-3 | FST | AKT3, RAF1, SRC, DRD2, EGFR, FGF23, FGFR1, IGF1, PIK3CD, PDGFA, | regulation of mammary gland development and lactation. |
| Th1 and Th2 cell differentiation | KEGG_PATHWAY | 5.6E-3 | 2.3E-3 | FST | JAK3, DLL3, IKBKB, IL12RB1, BOLA-DMA, BOLA-DOA, BOLA-DOB, MAPK10, MAPK13, MPK14, NOTCH2, RBPJ, STAT1, STAT4, STAT5A, STAT5B | Immune response |
| Th17 cell differentiation | KEGG_PATHWAY | 1.2E-2 | 5.6E-3 | FST | JUN; HSP90AA1, IFNGR2, IL23A, IL6ST, MAPK10, STAT6 | Immune response |
| Metabolic pathways | KEGG_PATHWAY | 1.2E-2 | 9.9E-3 | FST | ATP5F1B, ATP5PO, ATP5PD, HDDC3, NDUFB1, NDUFA4L2, ACSM1, ANPEP, CHPF2, CS, KMT2C, MAN2A2, NOS3, PTEN, GALNT11, GALNTL5, |  |
| Progesterone-mediated oocyte maturation | KEGG_PATHWAY | 1.5E-2 | 6.6E-3 | FST | BRAF, ADCY2, ADCY6, ADCY7, ANAPC1, ANAPC5, CDC26, CCNB1, HSP90AA1, INS, MAPK10, MAP13, MApk14, MAD1L1, PIK3R2 | Fertility |
| Mitophagy - animal | KEGG_PATHWAY | 1.7E-2 | 7.8E-3 | FST | BCL2L13, E2F1, NBR1, SRC, AMFR, BECN1, BECN2, CALCOCO2, CSNKK2A1, MITF, MTX1, MAP1LC3C, MAPK10, RHOT1, SIAH1, TP53, VCP | Immune response |
| Estrogen signaling pathway | KEGG_PATHWAY | 1.7E-2 | 8.7E-3 | FST | GNAO1, SHC1, SHC2, SRC, ADCY2, ADCY6, ADCY7, EBAG9, GRB2, HSP90AA1, HBEGF, KRT12, KRT20, KRT23, KRT39, KRT40, MMP2, NCOA3, PIK3R2, TFF1 | Reproduction |
| Growth hormone synthesis, secretion and action | KEGG_PATHWAY | 3.5E-2 | 1.8E-2 | FST | SHC1, SHC2, ADCY2, ADCY6, ADCY7, GRB2, GHRH, IRS2, MAPK10, MAPK13, MAPK13, MAPK14, MAP3K1, PIK3R2, STAT1, STAT3, STAT5A, STAT5B | Growth |
| Glycolysis / Gluconeogenesis | KEGG_PATHWAY | 3.6E-2 | 1.5E-2 | FST | ACSS2, ADH7, DLAT, GALM, G6PC1, G6PC3, GPI, HK2, MINPP1, PKLR, PKM | Energy metabolism |
| Carbon metabolism | KEGG_PATHWAY | 3.9E-2 | 2.0E-2 | FST | CSS2, DLAT, FH, GPI, HK2, ME1, MCEE, PHGDH, PGP, PSPH, PCCA, PKLR, PKM, SHMT2, SDHB, SDHD | Physiology |
| Melanogenesis | KEGG_PATHWAY | 4.0E-2 | 2.0E-2 | FST |  | Coat color |
| Relaxin signaling pathway | KEGG_PATHWAY | 4.1E-2 | 2.2E-2 | FST | GNAO1, SHC1, SHC2, SRC, ADCY2, ADCY6, ADCY7, COL4A1, COL4A2, EDNRB, GRB2, INSL3, MMP2, MAPK10, MAPK13, MAPK14, NOS1, PIK3R2 | Reproduction |

Supplementary Figure SF1: Observed heterozygosity for Asian Zebu and taurine populations using different LD thresholds.


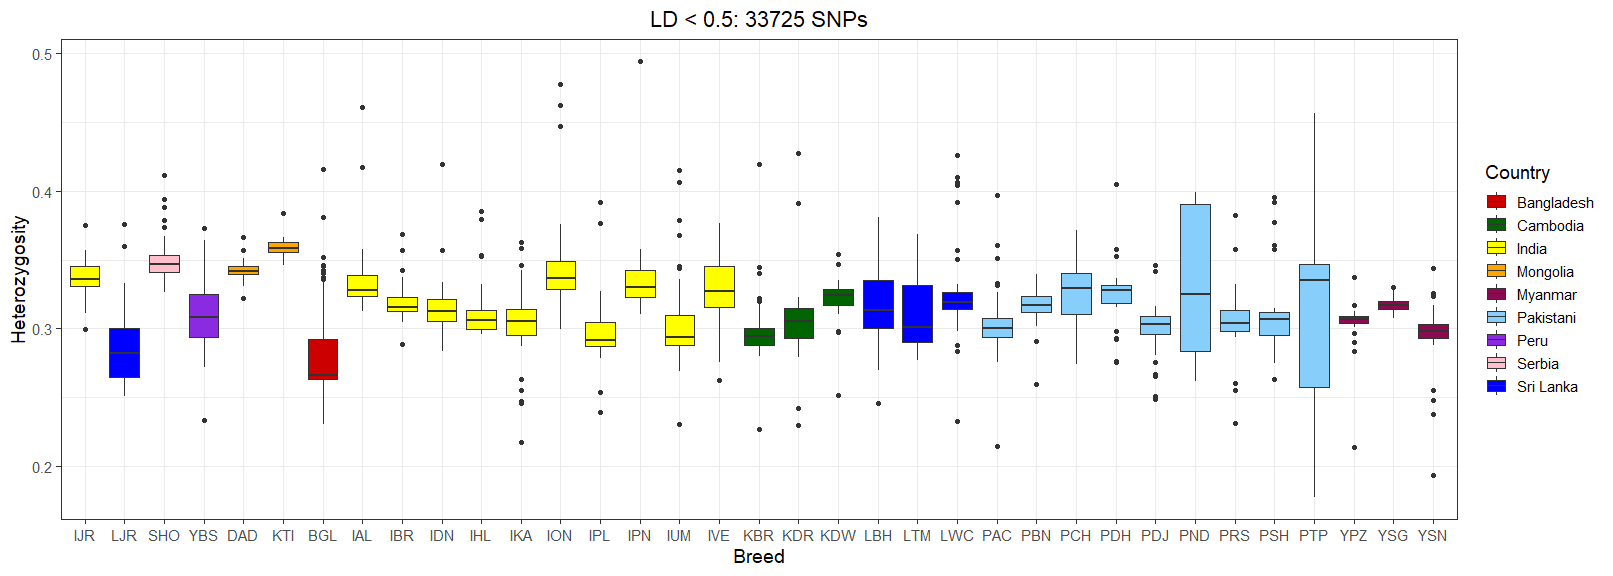


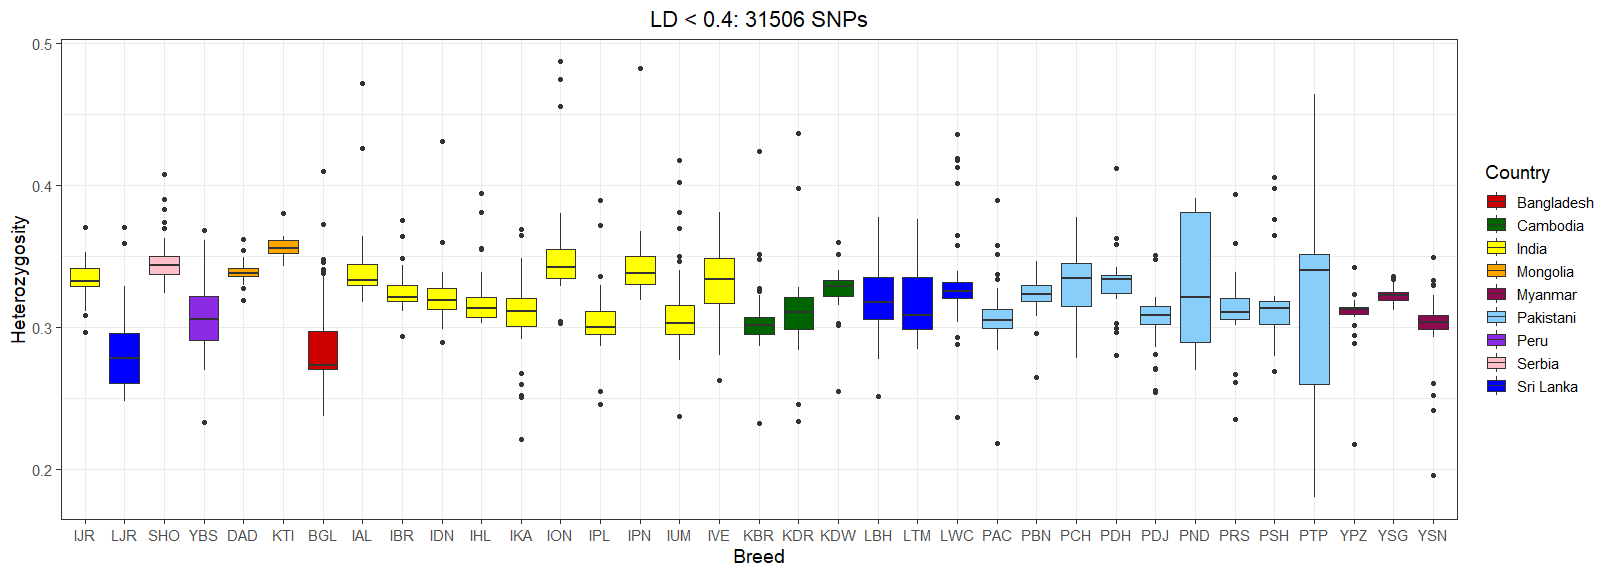


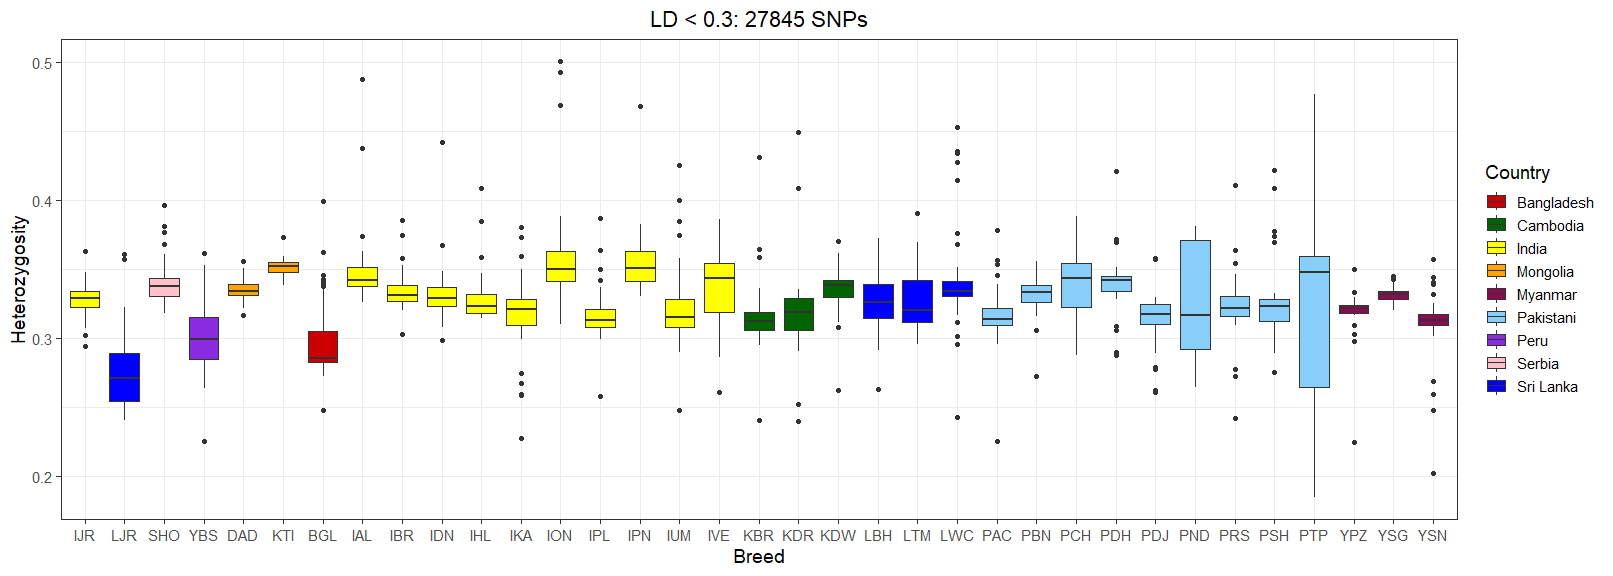


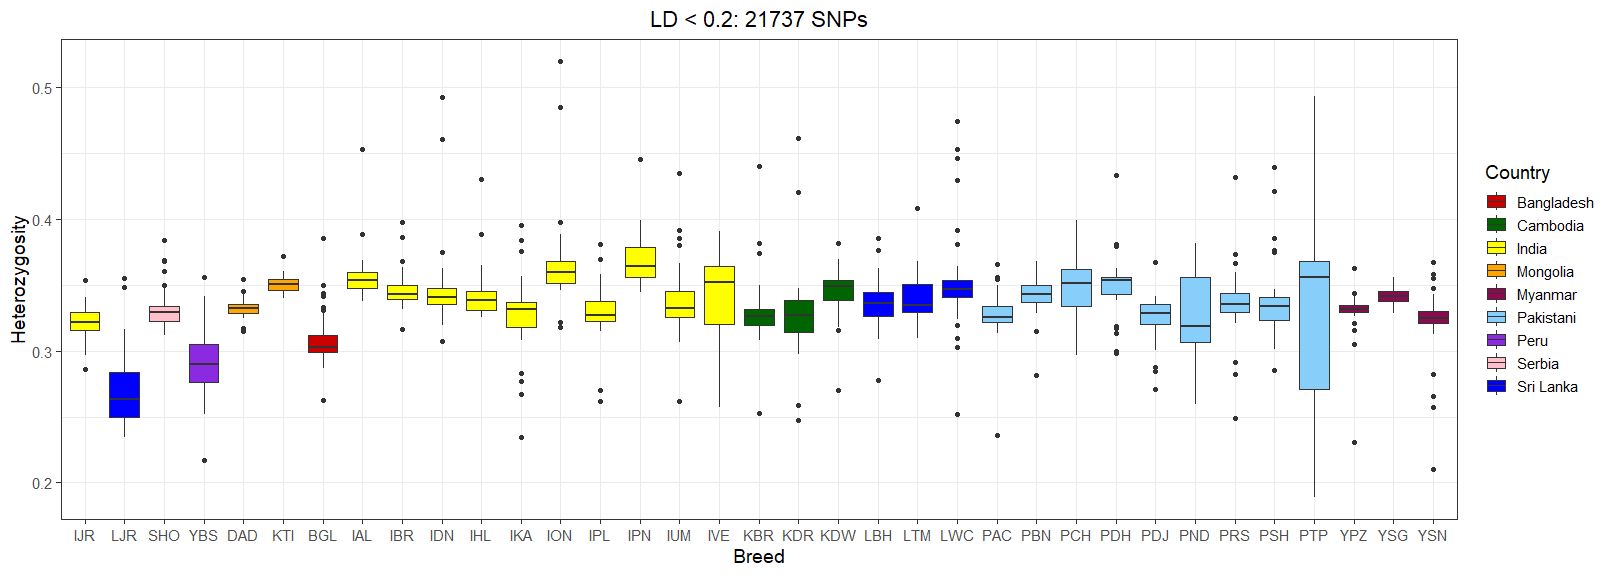


Supplementary Figure SF2. Cross-validation error across different values of K (number of ancestral populations) estimated using ADMIXTURE.


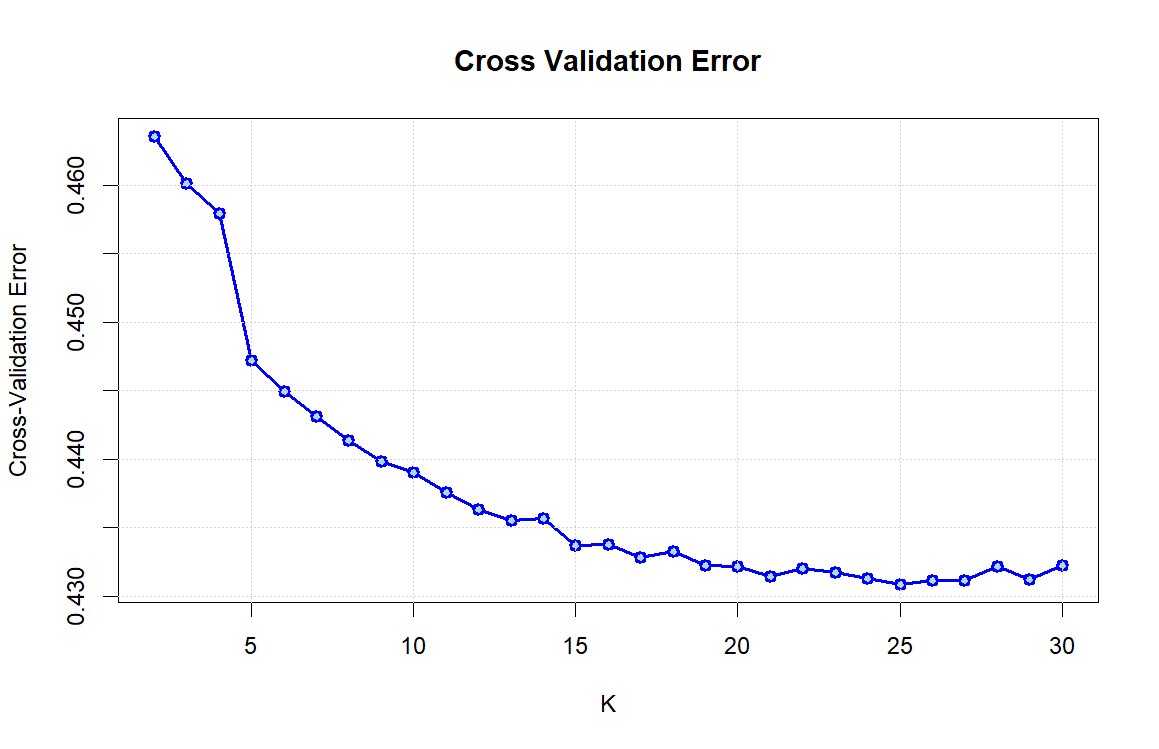


Supplementary Figure SF3. Treemix analysis of Zebu and taurine outgroup populations (a) model assuming k = 1000 and up to 5 migrations (b) Residual plot for 5 migrations model.


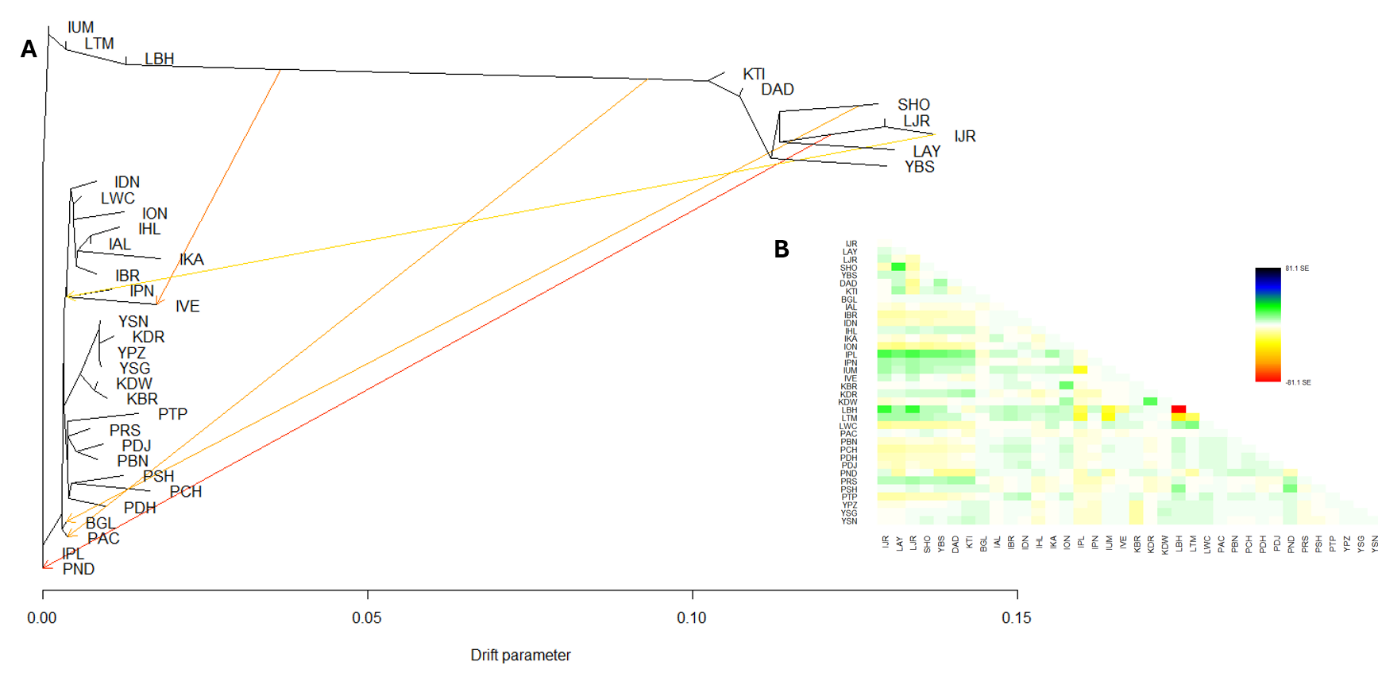

Supplement: Supplementary file 1 [file db0c43f43746098a0c964383.docx]
